# Table of Contents

## FEATURES

### *Approaches to Biology Teaching and Learning*

#### **The Problem of Revealing How Students Think: Concept Inventories and Beyond**

Julia I. Smith and Kimberly Tanner .....1–5

### *WWW.Life Sciences Education*

#### **Epigenetics Online: Multimedia Teaching Resources**

Louisa A. Stark .....6–9

### *From the National Academies*

#### **Integrated Biology and Undergraduate Science Education: A New Biology Education for the Twenty-First Century?**

Jay B. Labov, Ann H. Reid, and Keith R. Yamamoto .....10–16

### *Current Insights*

#### **Recent Research in Science Teaching and Learning**

Erin Dolan .....17–18

### *Educator Highlight*

#### **Maritza Macdonald**

Interviewed by Laura L. Mays Hoopes .....19–21

### *Book Review*

#### **A Long-Needed Textbook**

Randy Moore .....22–24

## ESSAY

#### **Educational Challenges of Molecular Life Science: Characteristics and Implications for Education and Research**

Lena A.E. Tibell and Carl-Johan Rundgren .....25–33

## ARTICLES

#### **Different but Equal? How Nonmajors and Majors Approach and Learn Genetics**

Jennifer K. Knight and Michelle K. Smith .....34–44

#### **Comparison of Views of the Nature of Science between Natural Science and Nonscience Majors**

Marie C. Desaulniers Miller, Lisa M. Montplaisir, Erika G. Offerdahl, Fu-Chih Cheng, and Gerald L. Ketterling .....45–54

#### **The Genomics Education Partnership: Successful Integration of Research into Laboratory Classes at a Diverse Group of Undergraduate Institutions**

Christopher D. Shaffer, Consuelo Alvarez, Cheryl Bailey, Daron Barnard, Satish Bhalla, Chitra Chandrasekaran, Vidya Chandrasekaran, Hui-Min Chung, Douglas R. Dorer, Chunguang Du, Todd T. Eckdahl, Jeff L. Poet, Donald Frohlich, Anya L. Goodman, Yuying Gosser, Charles Hauser, Laura L.M. Hoopes, Diana Johnson, Christopher J. Jones, Marian Kaehler, Nighat Kokan, Olga R. Kopp, Gary A. Kuleck, Gerard McNeil, Robert Moss, Jennifer L. Myka, Alexis Nagengast, Robert Morris, Paul J. Overvoorde, Elizabeth Shoop, Susan Parrish, Kelyne Reed, E. Gloria Regisford, Dennis Revie, Anne G. Rosenwald, Ken Saville, Stephanie Schroeder, Mary Shaw, Gary Skuse, Christopher Smith, Mary Smith, Eric P. Spana, Mary Spratt, Joyce Stamm, Jeff S. Thompson, Matthew Wawersik, Barbara A. Wilson, Jim Youngblom, Wilson Leung, Jeremy Buhler, Elaine R. Mardis, David Lopatto, and Sarah C.R. Elgin .....55–69

### *On the Cover*

The goal of the Genomics Education Partnership (GEP) is to provide an opportunity for undergraduates to participate in a genomics research project. Students undertake projects to improve the quality of raw sequence data for a given fosmid, annotate the genes, and analyze organizational features. The flow diagram shown on the cover illustrates the information management system. Currently, GEP students are assessing multiple species from the genus *Drosophila* to investigate the evolution of the small dot chromosome, a heterochromatic domain with a gene density equal to that found in euchromatic regions. See article by Shaffer *et al.*, p. 55.
